# Supplementary material for: Polyoxoanion-enveloped Ag/ptz inorganic–organic hybrid system: From a single to a double template
Source: Royal Society of Chemistry journal article supplement (doi:10.1039/c2ce06577k), 2012-01-01
Supplement: c2ce06577k.pdf [file c2ce06577k.pdf]

## Polyoxoanion-enveloped Ag/ptz Inorganic-organic Hybrid

### System: From a Single to a Double Template

**Table S1.** Selected bond lengths (Å) and angles (°) of compounds **1** and **2**.

| Compound 1                                                                                                                                                                                                                   |           |                       |          |
|------------------------------------------------------------------------------------------------------------------------------------------------------------------------------------------------------------------------------|-----------|-----------------------|----------|
| Ag(1)-N(5)#1                                                                                                                                                                                                                 | 2.255(16) | N(5)#1-Ag(1)-N(3)     | 157.4(5) |
| Ag(1)-N(3)                                                                                                                                                                                                                   | 2.260(14) | N(5)#1-Ag(1)-O(31)#2  | 96.4(5)  |
| Ag(1)-O(1W)                                                                                                                                                                                                                  | 2.52(2)   | N(3)-Ag(1)-O(31)#2    | 80.3(4)  |
| Ag(1)-O(31)#2                                                                                                                                                                                                                | 2.537(11) | N(6)-Ag(2)-N(4)       | 146.9(5) |
| Ag(1)-Ag(3)                                                                                                                                                                                                                  | 3.172(2)  | N(8)#3-Ag(3)-N(2)     | 141.7(5) |
| Ag(2)-N(6)                                                                                                                                                                                                                   | 2.222(13) | N(8)#3-Ag(3)-N(12)    | 118.7(5) |
| Ag(2)-N(4)                                                                                                                                                                                                                   | 2.236(14) | N(2)-Ag(3)-N(12)      | 98.9(5)  |
| Ag(2)-O(2W)                                                                                                                                                                                                                  | 2.487(14) | N(8)#3-Ag(3)-O(33)    | 86.2(4)  |
| Ag(3)-N(8)#3                                                                                                                                                                                                                 | 2.243(13) | N(2)-Ag(3)-O(33)      | 94.9(5)  |
| Ag(3)-N(2)                                                                                                                                                                                                                   | 2.249(15) | N(12)-Ag(3)-O(33)     | 100.0(4) |
| Ag(3)-N(12)                                                                                                                                                                                                                  | 2.331(13) | N(8)#3-Ag(3)-Ag(1)    | 107.3(4) |
| Ag(3)-O(33)                                                                                                                                                                                                                  | 2.542(10) | N(2)-Ag(3)-Ag(1)      | 66.4(4)  |
| Ag(4)-N(10)#1                                                                                                                                                                                                                | 2.135(12) | N(12)-Ag(3)-Ag(1)     | 85.3(4)  |
| Ag(4)-N(7)                                                                                                                                                                                                                   | 2.143(12) | O(33)-Ag(3)-Ag(1)     | 161.1(2) |
| Ag(5)-N(11)                                                                                                                                                                                                                  | 2.224(12) | N(10)#1-Ag(4)-N(7)    | 167.8(5) |
| Ag(5)-O(35)#4                                                                                                                                                                                                                | 2.276(11) | N(11)-Ag(5)-O(35)#4   | 138.0(4) |
| Ag(5)-N(9)#3                                                                                                                                                                                                                 | 2.356(13) | N(11)-Ag(5)-N(9)#3    | 124.9(4) |
| Symmetry transformations used to generate equivalent atoms for <b>1</b> : #1 -x+3/2, y-1/2, z #2 -x+3/2, -y+3/2, z+1/2 #3 -x+3/2, -y+3/2, z-1/2 #4 -x+1, -y+1, z+1/2 #5 -x+1, y, z #6 -x+1, -y+1, z-1/2 #7 -x+3/2, y+1/2, z. |           |                       |          |
| Compound 2                                                                                                                                                                                                                   |           |                       |          |
| Ag(1)-N(10)                                                                                                                                                                                                                  | 2.181(19) | N(10)-Ag(1)-N(22)     | 122.8(6) |
| Ag(1)-N(22)                                                                                                                                                                                                                  | 2.225(15) | N(10)-Ag(1)-Ag(7)     | 85.2(7)  |
| Ag(2)-N(9)                                                                                                                                                                                                                   | 2.205(16) | N(22)-Ag(1)-Ag(7)     | 103.4(4) |
| Ag(2)-N(12)                                                                                                                                                                                                                  | 2.252(15) | N(9)-Ag(2)-N(12)      | 138.9(7) |
| Ag(2)-N(16)                                                                                                                                                                                                                  | 2.340(16) | N(9)-Ag(2)-N(16)      | 118.8(7) |
| Ag(2)-O(12)#1                                                                                                                                                                                                                | 2.567(15) | N(12)-Ag(2)-N(16)     | 101.9(6) |
| Ag(3)-N(18)#3                                                                                                                                                                                                                | 2.145(18) | N(9)-Ag(2)-O(12)#1    | 87.2(6)  |
| Ag(3)-N(21)                                                                                                                                                                                                                  | 2.17(2)   | N(12)-Ag(2)-O(12)#1   | 110.5(5) |
| Ag(3)-O(18)                                                                                                                                                                                                                  | 2.593(14) | N(16)-Ag(2)-O(12)#1   | 73.9(5)  |
| Ag(4)-N(17)#4                                                                                                                                                                                                                | 2.299(18) | N(18)#3-Ag(3)-N(21)   | 169.1(7) |
| Ag(4)-N(24)                                                                                                                                                                                                                  | 2.358(15) | N(18)#3-Ag(3)-O(18)   | 83.8(6)  |
| Ag(4)-N(11)#5                                                                                                                                                                                                                | 2.430(14) | N(21)-Ag(3)-O(18)     | 93.4(6)  |
| Ag(5)-N(25)                                                                                                                                                                                                                  | 2.263(15) | N(17)#4-Ag(4)-N(24)   | 110.6(6) |
| Ag(5)-N(23)                                                                                                                                                                                                                  | 2.270(15) | N(17)#4-Ag(4)-N(11)#5 | 108.6(5) |

|               |           |                     |           |
|---------------|-----------|---------------------|-----------|
| Ag(5)-N(13)#6 | 2.307(16) | N(24)-Ag(4)-N(11)#5 | 106.2(5)  |
| Ag(6)-N(20)   | 2.201(15) | N(25)-Ag(5)-N(23)   | 123.7(5)  |
| Ag(6)-N(19)   | 2.208(15) | N(25)-Ag(5)-N(13)#6 | 120.6(5)  |
| Ag(6)-N(15)   | 2.516(14) | N(23)-Ag(5)-N(13)#6 | 115.5(5)  |
| Ag(7)-N(8)#4  | 2.116(17) | N(20)-Ag(6)-N(19)   | 148.0(5)  |
| Ag(7)-N(7)    | 2.122(17) | N(20)-Ag(6)-N(15)   | 102.9(5)  |
|               |           | N(19)-Ag(6)-N(15)   | 108.6(5)  |
|               |           | N(8)#4-Ag(7)-N(7)   | 175.1(10) |

Symmetry transformations used to generate equivalent atoms for **2**: #1  $x, y-1, z$  #2  $-x+3, -y-1, -z$   
#3  $-x+3, -y+1, -z+1$  #4  $-x+2, -y, -z$  #5  $-x+3, -y, -z$  #6  $x-1, y, z$  #7  $x, y+1, z$  #8  $x+1, y, z$

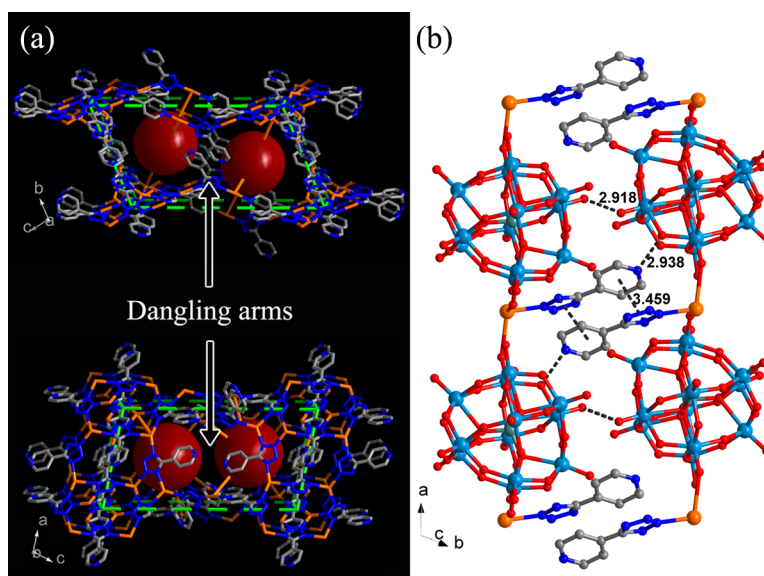

**Fig. S1** (a) View of a couple of Keggin anions enveloped in the nanocage in compound **2**. (b) The  $\pi$ - $\pi$  stacking and inter-molecular interaction between two L-e ligands rings and POM anions in compound **2**.

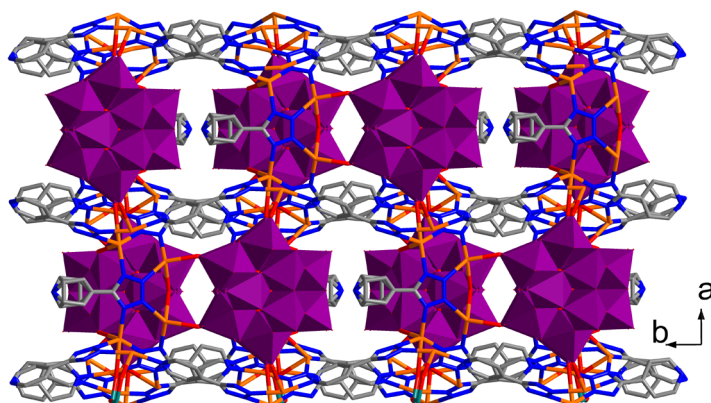

**Fig. S2** Stick/ polyhedral view of compound **1** along the  $c$  axis, showing that the Wells–Dawson polyoxoanions insert in a horizontal way between the metal-organic layers.

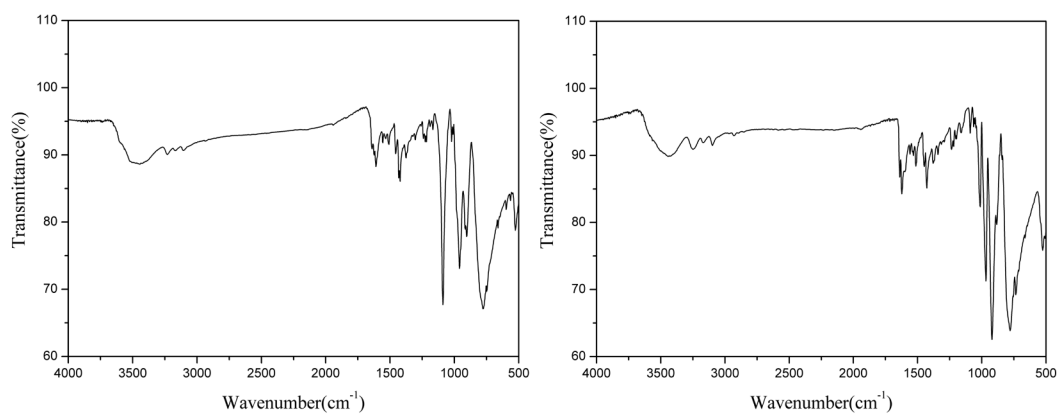

**Fig. S3** The IR spectra of compounds **1**(left) and **2**(right).

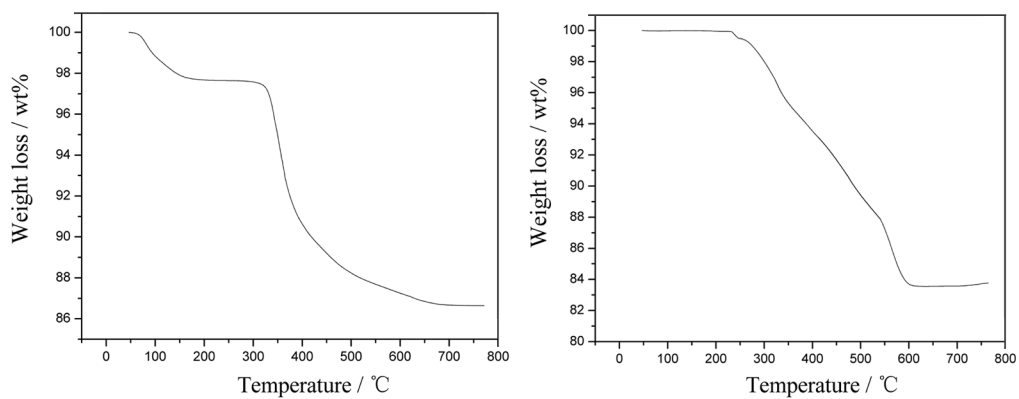

**Fig. S4** TG curves of compounds **1**(left) and **2**(right).

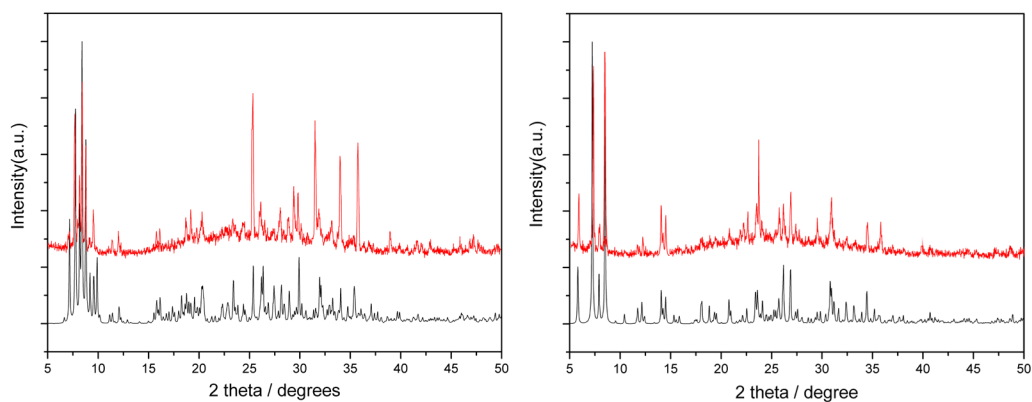

**Fig. S5** The PXRD patterns for compounds **1**(left) and **2**(right).

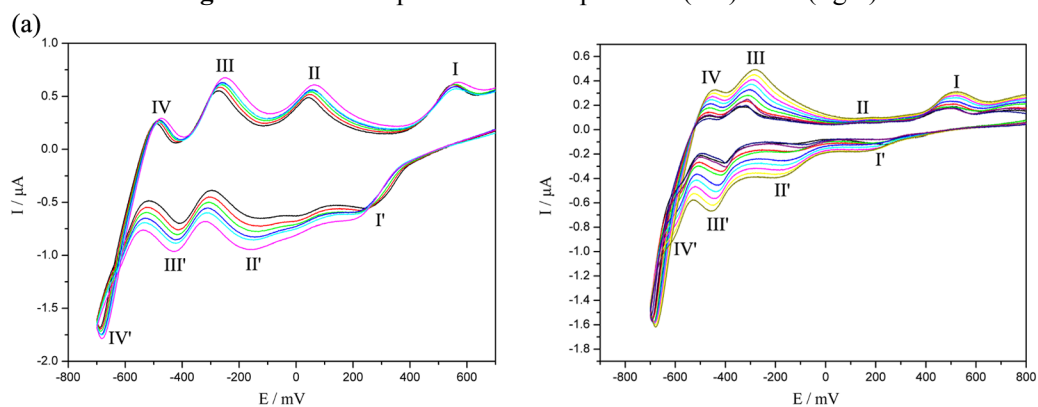

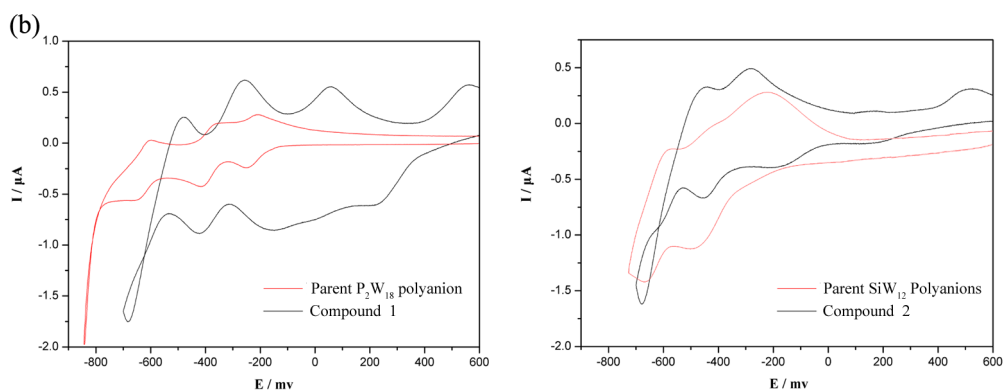

**Fig. S6** (a) The cyclic voltammograms of the **1**-CPE(left) and **2**-CPE(right) in 1M  $\text{H}_2\text{SO}_4$  at different scan rates (from inner to outer: 120, 140, 160, 180, 200, 220 and 480  $\text{mV}\cdot\text{s}^{-1}$  for **1**, 60, 80, 100, 120, 140, 160, 180, 200, 220 and 240  $\text{mV}\cdot\text{s}^{-1}$  for **2**). (b) The cyclic voltammograms of compound **1**, **2**, and parent  $\text{P}_2\text{W}_{18}$  and  $\text{SiW}_{12}$  polyoxoanions in 1 M  $\text{H}_2\text{SO}_4$  (scan rate: 200  $\text{mV}/\text{s}$ ).
